# Supplementary material for: ALTERED MERISTEM PROGRAM 1 Is involved in Development of Seed Dormancy in Arabidopsis
Source: PLoS One. 2011 May 26;6(5):e20408. doi: 10.1371/journal.pone.0020408 (PMC3102729; doi:10.1371/journal.pone.0020408)
Supplement: Table S4 — Probes differentially expressed in both amp1-1 and amp1-21. (XLS) [file pone.0020408.s009.xls]

## Sheet: Sheet1
Table S4. Probes differentially expressed in both amp1-1 and amp1-21. Comparisons were done in developing seeds at 10 days after pollination.
			Log2FC				Log2 Expression in All Samples
AGI	Annotation	ProbeID	Col.Amp1vsWT	c24.Amp1vsWT	P.Value	adj.P.Val	Col.WT	Col.WT	Col.WT	Col.Amp1	Col.Amp1	c24.WT	c24.WT	c24.WT	c24.Amp1	c24.Amp1	c24.Amp1
At5g48490	protease inhibitor/seed storage/lipid transfer protein (LTP) family protein	248683_at	6.33254	4.33063	5.78337e-05	0.00228454	3.90286	4.31238	4.51496	10.7852	10.3667	5.4581	6.18697	10.1756	11.2948	11.581	11.9368
At5g01870	lipid transfer protein, putative	251065_at	5.25389	2.94174	7.78331e-08	2.92017e-05	5.50833	5.8709	5.19122	10.7577	10.797	7.63307	8.47836	9.40563	11.6953	11.2739	11.3731
At5g38780	S-adenosyl-L-methionine:carboxyl methyltransferase family protein	249532_at	4.15636	-1.03996	6.20807e-07	0.000127411	3.94267	3.92188	3.93944	8.36272	7.81932	8.50521	8.21274	8.71097	6.58906	7.7301	7.98988
At5g40155	Encodes a defensin-like (DEFL) family protein.	249402_at	4.08963	1.5162	0.000322758	0.0065267	5.95765	4.57439	4.4523	9.64631	8.52251	6.3027	6.42813	8.19127	7.59683	8.35001	9.52386
At1g09750	chloroplast nucleoid DNA-binding protein-related	264672_at	3.8995	1.35026	3.73354e-07	9.33268e-05	5.14825	5.51622	5.36157	9.29751	9.18552	8.13937	9.05406	9.49254	10.5321	10.0646	10.1401
At1g76100	PETE1 (PLASTOCYANIN 1); copper ion binding / electron carrier	261769_at	3.75689	1.5784	5.02451e-07	0.000114609	5.44773	5.36653	5.9212	9.38774	9.28301	8.40237	9.28301	9.81	10.8178	10.6403	10.7724
At4g38410	dehydrin, putative	252988_at	3.42533	3.18885	3.66357e-08	1.92399e-05	5.67776	6.10488	5.89529	9.46313	9.17281	6.43759	6.50609	7.47871	9.6638	10.0749	10.2502
At4g21280	PSBQ_PSBQ-1_PSBQA__oxygen-evolving enhancer protein 3, chloroplast, putative (PSBQ1) (PSBQ)	254398_at	3.17745	1.41037	4.3987e-07	0.000104184	5.14515	5.00137	5.0392	8.40654	8.07216	7.62108	7.96491	8.7603	9.45437	9.3674	9.75562
At1g27540 At1g27580	F-box family protein	262319_s_at	3.01982	7.54059	5.18109e-13	1.18181e-08	8.81693	8.31984	8.62017	11.7292	11.4817	3.88319	3.7403	3.82744	11.186	11.65	11.2367
At3g50820	OEC33_PSBO-2__PSBO2 (PHOTOSYSTEM II SUBUNIT O-2); oxygen evolving/ poly(U) binding	252130_at	2.96608	1.59207	1.32669e-06	0.000207272	5.88823	6.45001	6.26853	9.16834	9.16834	8.30962	9.16834	9.44501	10.7915	10.2606	10.6472
At3g22540	unknown protein	256926_at	2.85982	2.34512	5.13121e-06	0.000507427	7.1076	7.05609	7.48003	10.2194	9.92943	7.67572	7.3993	8.99086	10.0316	10.4782	10.5914
At3g54560	HTA11; DNA binding	251846_at	2.85638	1.11116	0.000806896	0.0120035	6.48173	4.44879	5.47678	8.43455	8.21641	7.14627	7.78367	8.81763	9.04072	8.64469	9.39562
At4g28365 At4g32490	plastocyanin-like domain-containing protein	253433_s_at	2.84734	1.4281	2.30825e-05	0.00124177	6.10799	6.06775	5.95212	8.65949	9.12043	7.54409	8.43131	8.89838	10.0369	9.05023	10.071
At1g28290	AGP31 (arabinogalactan-protein 31)	245688_at	2.75649	2.71919	1.41103e-05	0.000943856	5.84977	5.14199	5.48221	8.04613	8.4495	5.76545	6.42346	7.7368	9.55384	9.03687	9.49257
At3g20950	CYP705A32; electron carrier/ heme binding / iron ion binding / monooxygenase/ oxygen binding	256802_at	2.69919	-1.20697	1.61074e-06	0.000235519	3.40924	3.38399	3.65972	6.31467	6.05233	6.87453	6.81168	7.85001	6.10175	5.91856	5.89499
At1g75690	chaperone protein dnaJ-related	262970_at	2.5555	1.32482	1.2002e-05	0.000844955	4.67202	4.9387	4.79845	7.51422	7.20289	7.15979	6.87313	8.19114	8.97388	8.42486	8.79978
At1g06080	ADS1 (DELTA 9 DESATURASE 1); oxidoreductase	260957_at	2.5355	1.15034	0.000100715	0.00325762	7.78189	7.50645	7.73656	10.1576	10.2633	7.75557	8.90376	9.61766	10.0609	9.83269	9.83443
At1g25275	unknown protein	245642_at	2.44904	1.77475	0.000453407	0.00810517	5.92341	6.14652	6.12369	8.74427	8.2829	6.29403	6.08811	7.99497	7.92875	8.43586	9.33674
At4g31840	plastocyanin-like domain-containing protein	253480_at	2.41413	2.00145	0.000271679	0.00587394	7.18974	7.14275	7.21399	9.61414	9.57843	7.28556	8.0152	9.73041	10.2384	10.2588	10.5384
At5g39860	PRE1 (PACLOBUTRAZOL RESISTANCE1); DNA binding / transcription factor	249383_at	2.38844	1.02569	0.000730684	0.0112273	4.20389	4.1355	3.93202	6.66307	6.29474	6.04636	5.64629	7.69765	7.34414	7.29486	7.82836
At1g29270	unknown protein	260883_at	2.34992	3.54563	0.000598409	0.00980583	3.27575	3.73627	3.27825	5.65554	5.90448	3.14647	3.87199	6.77794	8.16025	7.79027	8.48276
At5g64570	ATBXL4__XYL4; hydrolase, hydrolyzing O-glycosyl compounds / xylan 1,4-beta-xylosidase	247266_at	2.32843	1.49463	1.52375e-05	0.000978368	7.06679	6.96535	7.22257	9.50282	9.32384	7.48651	8.23277	8.41373	10.1999	9.16303	9.25398
At1g68590	plastid-specific 30S ribosomal protein 3, putative / PSRP-3, putative	262283_at	2.30474	1.85981	5.7867e-05	0.00228454	5.25275	5.18634	5.59318	7.77865	7.51901	6.99093	6.70019	8.36647	9.09408	8.94754	9.59541
At4g27440	PORB (PROTOCHLOROPHYLLIDE OXIDOREDUCTASE B); oxidoreductase/ protochlorophyllide reductase	253871_at	2.27802	1.42143	1.04332e-05	0.000767678	5.63139	6.14457	6.00459	8.21291	8.19683	7.98586	8.27887	8.81699	9.86242	9.23635	10.2472
At3g26510	octicosapeptide/Phox/Bem1p (PB1) domain-containing protein	257615_at	2.20756	1.47283	2.19e-05	0.00121247	6.02517	6.7734	6.50126	8.82144	8.46024	8.77418	7.59238	8.43179	9.99804	9.62181	9.59701
At1g18250	ATLP-1	256125_at	2.19189	2.06987	1.93238e-05	0.00114487	4.72129	5.21117	5.15689	7.15011	7.29323	5.75387	6.42339	7.37865	8.65616	8.34303	8.76633
At3g08940	LHCB4.2 (light harvesting complex PSII); chlorophyll binding	258993_at	2.12983	1.42598	3.09578e-06	0.000357461	8.14699	8.08217	8.41722	10.6842	10.0063	9.82246	9.81777	10.5746	11.4083	11.5894	11.495
At5g08000	PDCB2__E13L3 (GLUCAN ENDO-1,3-BETA-GLUCOSIDASE-LIKE PROTEIN 3); callose binding / polysaccharide binding	250565_at	2.12336	3.11774	2.14952e-07	6.00382e-05	6.49329	6.43085	6.49355	8.72914	8.4627	5.80483	6.1747	7.04699	9.69049	9.21229	9.47697
At3g05600	epoxide hydrolase, putative	258895_at	2.1114	1.71438	2.09188e-05	0.00119889	7.72634	7.51972	7.54671	9.77573	9.64225	8.25903	8.67365	9.77739	10.5851	10.5877	10.6804
At4g15910	DI21__ATDI21 (ARABIDOPSIS THALIANA DROUGHT-INDUCED 21)	245523_at	2.08896	1.82527	1.82921e-06	0.000259975	9.02673	8.59619	8.92868	11.0962	10.7828	8.33597	8.60778	9.3743	10.5221	10.5612	10.7105
At2g27250	CLV3 (CLAVATA3); kinase activator/ protein binding / receptor binding	265624_at	2.05047	3.00776	6.54285e-08	2.7135e-05	4.38991	4.63479	4.52184	6.99676	6.13521	4.45945	4.33896	4.21203	7.13803	7.14497	7.75072
At5g42830	transferase family protein	249188_at	2.0336	1.52363	2.15832e-07	6.00382e-05	5.83663	5.60894	5.8603	7.61645	7.98799	5.60882	6.0355	6.22041	7.35833	7.64834	7.42896
At2g19200	unknown protein	267437_at	2.01062	1.17795	9.02062e-05	0.0030482	3.77565	4.18436	3.86617	6.43629	5.46907	3.77032	3.4306	3.77629	4.67935	5.45513	4.37659
At5g44630	terpene synthase/cyclase family protein	249005_at	1.99595	2.59027	1.83791e-06	0.000259975	4.56302	4.19712	4.32866	6.25975	6.45802	4.08433	4.96426	4.93709	7.73744	6.69857	7.32046
At2g32765	ATSUMO5_SUM5__SUMO5 (SMALL UBIQUITINRELATED MODIFIER 5); protein tag	267555_at	1.97536	1.54544	0.000130828	0.00378705	6.41734	6.31101	6.43732	8.2639	8.46393	6.30553	7.32617	8.09973	8.77278	8.70774	8.88723
At1g09200	histone H3	264262_at	1.96897	1.79649	0.000452725	0.00810008	6.76035	6.21407	6.79184	8.6179	8.49754	6.90376	7.33098	8.84692	9.17403	9.34252	9.95459
At3g27690	LHCB2.4__LHCB2.3; chlorophyll binding	258239_at	1.95333	1.79367	0.000108481	0.00339896	4.76377	4.72149	5.01585	7.05636	6.51772	7.05636	7.05636	8.51434	9.58038	8.96876	9.45894
At5g16250	unknown protein	246505_at	1.94574	1.66055	0.000243204	0.00546013	5.95767	6.50556	5.7581	8.03462	8.0044	6.75801	7.10401	8.52113	9.11706	9.07508	9.17267
At4g15390	transferase family protein	245555_at	1.92737	2.55578	1.49424e-06	0.000229674	7.04719	6.96496	7.29834	9.23584	8.8259	6.97899	6.96843	7.8747	9.84959	9.40166	10.2382
At1g08560	ATSYP111_KN__SYP111 (SYNTAXIN OF PLANTS 111); SNAP receptor	264802_at	1.90559	3.02143	0.000123833	0.00369232	5.22103	5.18357	5.46538	7.00523	7.38593	4.5651	5.47832	7.16286	8.73451	8.52869	9.00735
At2g25060	plastocyanin-like domain-containing protein	264377_at	1.86452	2.32852	0.000197326	0.00480876	6.35364	5.93124	6.09676	8.03454	7.94892	5.89222	6.66242	8.12702	9.33031	8.93403	9.40287
At2g05520	ATGRP-3_GRP3__GRP-3 (GLYCINE-RICH PROTEIN 3)	265560_at	1.85575	3.40038	3.5953e-06	0.000396178	4.16514	3.91878	4.08433	6.0123	5.81138	4.32701	4.26295	4.53365	8.32974	6.65847	8.33652
At2g38810	HTA8 (HISTONE H2A 8); DNA binding	263264_at	1.82767	1.81238	2.81611e-06	0.000339397	4.94859	4.50031	4.5152	6.45957	6.50517	5.00578	5.35301	6.00023	7.33899	7.04808	7.4091
At3g08770	LTP6; lipid binding	258675_at	1.82169	2.96697	0.00412359	0.0350053	6.86029	6.99289	7.03843	8.12851	9.44261	5.92067	6.47732	8.95017	10.1709	8.85	11.2281
At5g48485	DIR1 (DEFECTIVE IN INDUCED RESISTANCE 1); lipid binding / lipid transporter	248684_at	1.82147	2.15912	0.00186272	0.0209211	6.9758	6.79643	7.50763	9.17333	8.65618	6.91451	7.30456	9.54273	9.8968	10.0997	10.2427
At5g17960	DC1 domain-containing protein	250068_at	1.81834	2.04761	4.67523e-06	0.000473965	4.59456	4.54868	4.30815	6.56045	6.04381	4.69293	4.87313	5.61485	6.67422	7.33225	7.31726
At1g60000	29 kDa ribonucleoprotein, chloroplast, putative / RNA-binding protein cp29, putative	263736_at	1.79519	1.56223	7.07205e-08	2.83006e-05	7.72003	7.51165	7.82251	9.52865	9.43119	8.5166	8.58716	9.04164	10.2997	10.2416	10.2907
At1g32470	glycine cleavage system H protein, mitochondrial, putative	260704_at	1.7824	1.49378	1.13581e-05	0.000817282	6.70676	6.83276	6.87522	8.45692	8.71771	7.34933	7.52229	8.39448	9.42033	8.99238	9.33474
At4g28703	FUNCTIONS IN: molecular_function unknown; LOCATED IN: cellular_component unknown; EXPRESSED IN: 6 plant structures; EXPRESSED DURING: 4 anthesis, F mature embryo stage, petal differentiation and expansion stage, D bilateral stage, E expanded cotyledon sta	253737_at	1.77391	1.10136	0.000759913	0.0115078	6.42117	6.47336	6.768	8.36775	8.28842	7.30072	6.71132	8.33394	8.08866	8.75888	8.80253
At1g31950	terpene synthase/cyclase family protein	255751_at	1.76645	2.1478	5.83291e-07	0.000123193	4.60618	4.432	4.53242	6.17596	6.40401	4.94346	5.13716	5.4462	7.85183	7.1276	6.99079
At4g33330	PGSIP3__transferase, transferring glycosyl groups	253379_at	1.7636	1.30155	0.0053439	0.0415171	4.95982	5.12345	5.28304	7.1406	6.63081	5.24492	5.77528	7.53058	7.11435	7.34823	7.99284
At3g16520	UGT88A1__UDP-glucoronosyl/UDP-glucosyl transferase family protein	257205_at	1.74632	1.76455	0.00198623	0.0217086	6.21155	4.97023	5.95391	7.68805	7.22839	6.29418	5.82286	7.70636	7.99603	8.14273	8.97827
At5g47370	HAT2; DNA binding / transcription factor/ transcription repressor	248801_at	1.74166	1.4626	2.72434e-05	0.00140912	6.67805	7.24715	6.98206	8.71758	8.70392	7.23211	7.50874	8.08596	8.76793	8.8765	9.57018
At3g06390	integral membrane family protein	258905_at	1.72952	2.63288	1.66185e-05	0.00103288	9.18497	9.31291	9.63917	11.0803	11.1367	7.57458	8.88215	8.39494	10.2745	11.526	10.9498
At4g14540	NF-YB3 (NUCLEAR FACTOR Y, SUBUNIT B3); transcription factor	245592_at	1.72915	1.42167	0.0019906	0.0217281	4.24848	4.47065	4.56824	6.38956	5.92699	5.64467	5.41058	7.39792	7.2862	7.52017	7.91182
At5g05390	LAC12 (laccase 12); laccase	250770_at	1.72601	2.00129	3.3094e-06	0.000377437	6.2289	6.1679	6.25064	7.82619	8.05746	5.9996	6.48546	6.76012	8.88524	8.45219	7.91163
At1g75030	ATLP-3	259987_at	1.72578	-0.958612	0.00450136	0.0369737	6.14114	6.05079	6.10522	8.10584	7.54382	8.89024	9.15844	9.64023	7.10034	9.03009	8.68266
At5g10220	ANNAT6__ANN6 (ANNEXIN ARABIDOPSIS 6); calcium ion binding / calcium-dependent phospholipid binding	250473_at	1.70752	1.97978	0.00365677	0.0321529	3.6895	3.33216	3.68409	5.43288	5.11933	3.31742	4.19363	6.09594	6.15454	6.31732	7.07447
At4g02060	MCM7__PRL (PROLIFERA); ATP binding / DNA binding / DNA-dependent ATPase/ nucleoside-triphosphatase/ nucleotide binding	255513_at	1.68946	1.77847	0.000316079	0.00646231	3.56206	3.88696	3.88141	5.70599	5.22654	4.79602	4.73036	6.27625	6.56639	7.27828	7.29335
At3g20670	HTA13; DNA binding	256666_at	1.6874	1.57291	0.00127677	0.0163797	7.01603	6.54142	6.75068	8.39163	8.52192	6.95912	7.06075	8.73893	8.99699	8.77582	9.70474
At5g07550	ATGRP19__GRP19 (GLYCINE-RICH PROTEIN 19); lipid binding	250610_at	1.67184	1.62556	1.0333e-05	0.000762769	4.79851	4.84497	4.55894	5.98286	6.82911	4.92118	4.79563	5.06174	6.99151	6.17381	6.48993
At5g35630	ATGSL1_GLN2__GS2 (GLUTAMINE SYNTHETASE 2); glutamate-ammonia ligase	249710_at	1.6669	1.90918	0.000512048	0.00880011	5.43478	5.57407	5.49902	7.09008	7.24897	5.7762	6.60898	7.94793	8.89037	8.45104	8.71924
At3g07350	unknown protein	259015_at	1.66678	1.14516	0.00249356	0.0250538	5.85929	5.79325	5.88545	7.71047	7.31508	6.81883	6.61089	8.31358	7.85891	8.47453	8.84535
At2g35370	GDCH; glycine dehydrogenase (decarboxylating)	266636_at	1.66647	1.11195	0.000128047	0.00376393	6.57164	6.23816	6.43242	8.00428	8.15681	6.98513	7.43186	8.30424	8.79805	8.54289	8.71613
At5g02550	unknown protein	251010_at	1.65999	1.70586	0.00213288	0.0226165	7.432	7.02712	7.59044	9.37585	8.64384	7.86634	7.29672	9.3169	9.25891	9.979	10.3596
At4g23800	high mobility group (HMG1/2) family protein	254233_at	1.64143	2.11009	0.00106105	0.0144752	4.37458	4.11179	4.226	5.87888	5.87888	4.45793	5.31651	6.97762	7.70907	7.41677	7.95649
At1g55490	LEN1__CPN60B (CHAPERONIN 60 BETA); ATP binding / protein binding	265076_at	1.63381	1.38792	9.38883e-05	0.00312641	4.93225	4.70431	5.35568	6.64475	6.61771	6.26304	6.67138	7.32051	8.31341	7.68472	8.42055
At5g13630	CCH_CCH1_CHLH__GUN5 (GENOMES UNCOUPLED 5); magnesium chelatase	250243_at	1.62128	1.36286	1.52843e-06	0.000230885	7.18995	7.22753	7.32456	8.92661	8.81065	8.75088	8.66835	9.25948	10.43	9.93633	10.401
At1g10640	polygalacturonase	261834_at	1.59385	1.17629	0.00108349	0.0146761	5.44491	5.83138	5.74205	7.00835	7.52492	6.2086	7.15507	6.76014	8.71859	7.60779	7.3263
At1g26680	transcriptional factor B3 family protein	261260_at	1.56683	1.78964	4.35901e-06	0.00045195	6.57053	6.59026	6.5483	7.91184	8.36121	6.67403	7.05825	7.14165	9.21186	8.26584	8.76514
At3g01480	CYP38 (cyclophilin 38); peptidyl-prolyl cis-trans isomerase	259193_at	1.54346	1.06046	3.02726e-06	0.000352305	6.09382	5.99567	6.14509	7.6793	7.564	7.4274	7.1402	7.86436	8.60086	8.38494	8.62755
At5g22880	H2B__HTB2; DNA binding	249916_at	1.54312	1.76963	1.13572e-06	0.000185845	7.09547	7.02611	7.1567	8.86904	8.40273	6.97052	7.12371	7.66878	8.949	8.87081	9.25211
At5g09570	FUNCTIONS IN: molecular_function unknown; INVOLVED IN: biological_process unknown; LOCATED IN: chloroplast; EXPRESSED IN: 23 plant structures; EXPRESSED DURING: 14 growth stages; CONTAINS InterPro DOMAIN/s: CHCH (InterPro:IPR010625); BEST Arabidopsis thal	250515_at	1.54136	-1.7432	2.88133e-06	0.000340535	6.67094	6.49607	6.43584	8.15396	7.99733	10.0412	9.98732	10.4755	8.16917	8.16917	8.93614
At3g57240	BG3 (BETA-1,3-GLUCANASE 3); cellulase/ hydrolase, hydrolyzing O-glycosyl compounds	251673_at	1.51593	1.06166	0.00202518	0.0219265	5.81501	6.1622	5.87455	6.79068	8.14235	6.38276	6.84937	6.50174	8.31751	7.38508	7.21628
At1g48930	AtGH9C1 (Arabidopsis thaliana glycosyl hydrolase 9C1); catalytic/ hydrolase, hydrolyzing O-glycosyl compounds	260758_at	1.5091	1.05357	0.00788963	0.0542056	5.98641	5.67911	5.28415	7.12702	7.19096	5.95637	7.62739	7.57204	7.95015	7.62288	8.7435
At1g52230	PSAH-2_PSI-H__PSAH2 (PHOTOSYSTEM I SUBUNIT H2)	259840_at	1.50178	1.11194	0.000193517	0.00477822	8.39726	8.38068	8.4708	9.86937	9.96669	9.53412	10.0644	10.7257	11.4944	10.8243	11.3414
At3g08030	unknown protein	258641_at	1.48392	1.86033	2.47734e-05	0.00130203	6.78347	6.75963	6.86401	8.15637	8.41621	6.82288	7.16243	7.93746	9.08734	8.79531	9.62112
At1g33055	unknown protein	261567_at	1.48334	1.24731	0.00259576	0.0257972	9.9821	9.10394	10.4774	11.6451	11.0305	10.6542	9.46506	10.6542	11.6765	11.2798	11.5591
At2g33800	ribosomal protein S5 family protein	267435_at	1.47662	1.01839	1.5633e-06	0.000233065	7.58323	7.31778	7.42961	9.01733	8.823	8.80968	8.823	9.18157	10.0345	9.71485	10.1201
At2g23240	plant EC metallothionein-like family 15 protein	245070_at	1.4498	-1.07996	0.000794666	0.0118628	5.55965	6.19299	6.08953	7.61081	7.18357	9.93895	9.00107	9.182	7.82045	8.24013	8.82156
At3g53190	pectate lyase family protein	251982_at	1.4429	1.36389	5.32875e-05	0.00218221	6.90453	6.74888	6.93057	8.33709	8.27137	6.76221	7.57887	7.99509	8.85942	8.8334	8.73501
At4g23750	CRF2 (CYTOKININ RESPONSE FACTOR 2); DNA binding / transcription factor	254235_at	1.43841	1.93064	1.90382e-05	0.00113384	4.86204	4.35532	5.02039	6.18399	6.18466	4.76674	5.37615	5.77063	6.90374	7.18444	7.61726
At5g64310	ATAGP1__AGP1 (ARABINOGALACTAN PROTEIN 1)	247279_at	1.42859	1.53123	2.11386e-05	0.00119934	7.35173	7.64957	7.8385	9.13558	8.94813	8.1197	7.86912	8.77903	9.97338	9.46139	9.92677
At1g75750	GASA1 (GAST1 PROTEIN HOMOLOG 1)	262947_at	1.42409	-1.40007	0.00303036	0.0284333	7.15951	6.8247	7.56799	8.50155	8.71476	10.0976	10.8212	11.6193	8.67621	9.57604	10.0856
At1g32170	XTH30__XTR4 (XYLOGLUCAN ENDOTRANSGLYCOSYLASE 4); hydrolase, acting on glycosyl bonds / hydrolase, hydrolyzing O-glycosyl compounds / xyloglucan:xyloglucosyl transferase	245794_at	1.41953	1.41423	0.000112037	0.00345872	6.93154	6.88667	7.10944	8.28718	8.50366	6.53614	6.71109	7.64395	8.43958	8.70013	7.99417
At1g60030	xanthine/uracil permease family protein	263734_at	1.41318	0.989881	7.98016e-06	0.000663738	7.8634	8.23263	8.37003	9.54116	9.59592	8.3739	8.51875	8.9365	9.5911	9.7256	9.48209
At1g76800	nodulin, putative	259871_at	1.40799	1.76783	4.80207e-06	0.000482534	6.21372	6.24697	6.10289	7.74516	7.44654	5.84249	5.54059	5.92511	7.18085	8.09764	7.33319
At5g63650	SNRK2-5_SRK2H__SNRK2.5 (SNF1-RELATED PROTEIN KINASE 2.5); kinase	247352_at	1.39478	1.62292	5.02403e-08	2.30109e-05	7.31449	7.72511	7.46726	8.87009	8.92404	7.8801	7.8008	7.99943	9.3753	9.51268	9.66111
At3g18780	DER1_ENL2_LSR2__ACT2 (ACTIN 2); structural constituent of cytoskeleton	257749_at	1.38562	1.05845	8.16059e-07	0.000150115	6.94484	7.05753	6.94343	8.33464	8.40047	7.91466	8.21106	8.22326	9.35605	8.91433	9.25396
At5g36710 At5g36800	unknown protein	249659_s_at	1.36896	2.11058	0.000402144	0.00751878	4.97303	4.57587	4.93021	6.16453	6.22614	4.73881	5.48972	6.83614	7.62997	7.83145	7.93501
At3g56090	ATFER3 (ferritin 3); binding / ferric iron binding / oxidoreductase/ transition metal ion binding	251735_at	1.35374	1.13017	0.000181145	0.00459102	5.01261	5.69254	5.49999	6.78009	6.73082	6.18027	6.73082	6.7429	7.76683	7.20033	8.07735
At5g51750	SBT1.3__ATSBT1.3 (ARABIDOPSIS THALIANA SUBTILASE 1.3); identical protein binding / serine-type endopeptidase	248427_at	1.34833	1.46566	9.11692e-06	0.000715095	7.89368	7.45289	7.96092	9.08903	9.14595	7.85125	7.74211	8.34342	9.25507	9.29494	9.78373
At1g71890	ATSUC5__SUC5; carbohydrate transmembrane transporter/ sucrose:hydrogen symporter/ sugar:hydrogen symporter	260170_at	1.34572	1.8303	0.000225725	0.00523783	6.15559	6.37874	6.58603	7.59127	7.84707	6.76965	7.38547	8.23725	9.53487	8.75414	9.59424
At3g45130	LAS1; lanosterol synthase	252611_at	1.34349	1.06088	2.10505e-05	0.00119934	6.50314	6.63129	6.5662	7.94399	7.87673	6.46892	6.85486	7.37252	8.01102	8.02383	7.84409
At2g47720 At2g47730	FUNCTIONS IN: molecular_function unknown; INVOLVED IN: biological_process unknown; LOCATED IN: chloroplast; EXPRESSED IN: 7 plant structures; EXPRESSED DURING: 4 anthesis, F mature embryo stage, petal differentiation and expansion stage, D bilateral stage	266502_at	1.3288	1.1146	2.03843e-06	0.00027351	5.65427	5.69041	5.75828	6.85431	7.20527	5.08953	5.09178	4.63734	6.17252	5.91561	6.07433
At3g43960	cysteine proteinase, putative	252692_at	1.31853	1.24055	0.000782948	0.0117416	6.19921	5.8968	6.3986	7.78676	7.18003	6.76478	6.53414	7.47852	8.07082	7.69077	8.73749
At3g54050	fructose-1,6-bisphosphatase, putative / D-fructose-1,6-bisphosphate 1-phosphohydrolase, putative / FBPase, putative	251885_at	1.30303	2.43044	1.12109e-05	0.000814192	4.86204	5.2027	5.27234	6.30522	6.52556	5.10116	5.50801	6.04924	8.47717	7.35109	8.12148
At5g10390	histone H3	250434_at	1.29786	1.42804	0.00032327	0.00653125	5.93279	5.65503	6.22371	7.27306	7.197	5.85698	6.27042	7.17718	7.6075	7.79803	8.18316
At5g08030	glycerophosphoryl diester phosphodiesterase family protein	250561_at	1.2972	1.35903	0.000139048	0.00393997	4.4744	4.24603	4.26662	5.41082	5.8416	4.76646	5.88227	5.75835	7.01621	6.80973	6.65824
At4g37750	CKC_CKC1_DRG__ANT (AINTEGUMENTA); DNA binding / transcription factor	253010_at	1.29553	1.60191	2.37429e-05	0.00126833	4.69156	4.22514	4.62771	5.98522	5.63544	4.54198	5.23668	5.45265	6.48783	6.61575	6.93347
At3g02640	unknown protein	258480_at	1.28535	1.7613	0.000396509	0.00746235	5.72799	5.70158	6.08729	7.02555	7.22305	6.00798	6.38966	7.6091	8.66152	8.02999	8.59913
At5g38180	protease inhibitor/seed storage/lipid transfer protein (LTP) family protein	249549_at	1.28292	5.94809	4.73255e-08	2.30109e-05	9.65594	9.35046	10.1371	11.0807	10.9141	4.56205	4.28315	5.68704	10.2494	10.7589	11.3682
At4g32830	AtAUR1 (ATAURORA1); histone kinase(H3-S10 specific) / kinase/ protein serine/threonine kinase	253403_at	1.26324	1.85494	0.000487875	0.00851448	5.25091	5.10791	5.33901	6.48878	6.50292	5.27775	5.66185	6.91641	8.09429	7.23808	8.08845
At1g13710	CYP78A5; electron carrier/ heme binding / iron ion binding / monooxygenase/ oxygen binding	256099_at	1.25603	1.58483	2.99908e-07	7.95455e-05	6.32944	6.59416	6.40819	7.73811	7.66181	6.84211	7.06074	6.84241	8.81588	8.363	8.32088
At2g19320	unknown protein	267321_at	1.2444	1.58316	0.00146739	0.0179662	8.65903	8.33066	8.92554	10.1729	9.5927	8.3465	8.17059	9.2088	9.29717	10.4769	10.7013
At2g27970	CKS2 (CDK-subunit 2); cyclin-dependent protein kinase/ cyclin-dependent protein kinase regulator	264061_at	1.23272	1.75103	0.000113361	0.00347104	7.75564	7.8275	7.81723	8.80304	9.26264	7.57785	7.62558	8.78284	9.98794	9.40338	9.84803
At1g65500	unknown protein	264635_at	1.23073	1.1053	0.000494986	0.00860566	5.30867	5.0362	5.30185	6.70779	6.18482	5.15108	4.92949	6.07923	6.63049	6.52009	6.32511
At5g25470	DNA binding	246889_at	1.22791	1.08388	3.71133e-08	1.92399e-05	8.06556	8.0148	8.01435	9.29459	9.22436	8.28689	8.31668	8.42865	9.52613	9.34479	9.41293
At2g43560	immunophilin / FKBP-type peptidyl-prolyl cis-trans isomerase family protein	260542_at	1.21401	1.01246	8.96553e-06	0.000710464	6.79262	6.68075	7.04642	8.12536	7.98252	7.48501	7.44213	7.74368	8.72508	8.25175	8.73138
At3g16370	GDSL-motif lipase/hydrolase family protein	259375_at	1.2134	2.13146	0.0034093	0.0308222	5.35695	4.88275	5.24455	6.55359	6.19604	5.15652	5.4859	7.42664	7.39706	8.30703	8.75934
At2g38210 At2g38230	PDX1L4 (PUTATIVE PDX1-LIKE PROTEIN 4)	267138_s_at	1.20853	2.36416	9.6398e-09	7.90635e-06	5.75405	5.83759	5.69716	7.10298	6.83994	5.2676	5.41932	5.23907	7.39016	7.7658	7.86251
At1g07370	PCNA1 (PROLIFERATING CELLULAR NUCLEAR ANTIGEN); DNA binding / DNA polymerase processivity factor/ protein binding	261080_at	1.19045	1.18184	0.00203569	0.0220171	5.35998	4.70955	5.07413	6.31437	6.16231	5.27999	5.77605	6.61611	6.94534	6.70856	7.56378
At3g27060	TSO2 (TSO meaning 'ugly' in Chinese); oxidoreductase/ ribonucleoside-diphosphate reductase/ transition metal ion binding	257809_at	1.18793	1.83105	8.03818e-05	0.00282154	6.40076	5.97229	6.67163	7.66514	7.40717	6.4698	6.70952	7.63184	8.75733	8.50303	9.04396
At3g13790	ATCWINV1__ATBFRUCT1; beta-fructofuranosidase/ hydrolase, hydrolyzing O-glycosyl compounds	256787_at	1.18443	1.62788	3.33189e-05	0.00160338	4.133	4.38428	4.02839	5.34933	5.38332	4.33868	4.89977	5.38947	6.81247	6.25282	6.44625
At2g14460	unknown protein	265831_at	1.17885	5.15629	5.70915e-10	2.17043e-06	7.54255	6.93066	7.33769	8.73052	8.16777	3.31891	3.45546	3.63185	8.28699	8.76007	8.82803
At1g65900	unknown protein	261921_at	1.17856	1.68397	0.000233642	0.00531343	4.95456	5.30315	4.8857	6.1493	6.30342	4.80675	5.84204	6.02666	7.55037	6.74702	7.42998
At2g14900	gibberellin-regulated family protein	266613_at	1.16441	1.29944	0.000691263	0.0108041	7.96172	8.47302	8.15118	9.16656	9.55288	8.02197	8.08886	9.15374	9.69521	9.40162	10.066
At5g48850	ATSDI1 (SULPHUR DEFICIENCY-INDUCED 1); binding	248676_at	1.16258	-3.46156	0.00746232	0.0521035	5.71147	5.87033	5.57923	6.81906	6.94678	8.97627	11.6105	10.2316	5.44531	5.77508	9.21325
At5g03940	54CP_FFC_SRP54CP__CPSRP54 (CHLOROPLAST SIGNAL RECOGNITION PARTICLE 54 KDA SUBUNIT); 7S RNA binding / GTP binding / mRNA binding / signal sequence binding	250884_at	1.16212	0.992113	0.000818673	0.0121338	5.34485	5.37889	5.60653	6.62824	6.58284	6.43372	6.68299	7.51461	7.74905	7.58637	8.27224
At3g06030	MAPKKK12__ANP3 (ARABIDOPSIS NPK1-RELATED PROTEIN KINASE 3); ATP binding / kinase/ protein kinase/ protein serine/threonine kinase	258471_at	1.16009	1.48552	4.11042e-05	0.00183822	4.35565	4.79134	4.46905	5.667	5.73054	5.35812	5.05933	5.27201	7.12694	6.12281	6.89627
At1g62030	DC1 domain-containing protein	264310_at	1.15234	1.03734	0.000289735	0.00614073	4.78344	5.04964	4.90156	6.3102	5.81759	5.01525	5.12024	5.72307	6.74191	6.20683	6.02182
At5g15230	GASA4 (GAST1 PROTEIN HOMOLOG 4)	250109_at	1.14246	2.09556	4.37155e-05	0.00189724	6.22818	5.92269	5.55998	6.77502	7.31712	5.78507	6.62196	6.90501	8.59438	8.18813	8.81619
At5g18660	PCB2 (PALE-GREEN AND CHLOROPHYLL B REDUCED 2); 3,8-divinyl protochlorophyllide a 8-vinyl reductase	250006_at	1.13497	1.1198	0.000156987	0.0042029	6.71991	6.24217	6.73916	7.82042	7.58369	6.73396	7.01806	7.56555	8.36631	7.94334	8.36729
263268_at	0	263268_at	1.13333	1.21106	0.00185939	0.0209038	4.29441	4.81645	5.38131	6.26254	5.66558	4.39488	4.37109	5.17977	5.56963	6.2735	5.73579
At3g24340	chr40 (chromatin remodeling 40); ATP binding / DNA binding / helicase/ nucleic acid binding	257167_at	1.13046	1.14154	0.000704144	0.0109627	4.96224	4.99492	5.07444	6.13966	6.14234	5.73003	5.9264	6.77034	7.48077	6.76704	7.60358
At1g07320	RPL4; poly(U) binding / structural constituent of ribosome	261078_at	1.12995	1.02781	0.000116429	0.00351754	6.92572	6.72551	6.99413	8.0103	8.01317	7.54802	7.94731	8.37184	9.18864	8.65149	9.11046
At4g27550	TPS4__ATTPS4; alpha,alpha-trehalose-phosphate synthase (UDP-forming)/ transferase, transferring glycosyl groups	253878_at	1.11977	1.80041	4.05276e-05	0.00182695	6.04806	5.79313	5.64735	7.0737	6.82487	5.76825	5.80393	6.88347	7.8908	7.89626	8.06981
At5g59870	HTA6; DNA binding	247651_at	1.11109	1.25464	0.00323626	0.0296105	8.38575	8.0313	8.10848	9.1438	9.42874	8.22075	8.54646	9.76261	10.246	9.62769	10.42
At5g50740	metal ion binding	248526_at	1.10905	1.31829	0.00133903	0.0169308	5.9807	6.48185	6.08468	7.49777	7.08514	5.80206	6.27152	7.25463	7.63704	7.58495	8.06108
At1g50490	UBC20 (ubiquitin-conjugating enzyme 20); ubiquitin-protein ligase	261859_at	1.10892	1.38299	0.00053232	0.00902767	5.55974	5.09221	5.43669	6.44567	6.49793	5.49606	6.0477	6.86232	7.62597	7.21465	7.71443
At1g79850	CS17_PRPS17__RPS17 (RIBOSOMAL PROTEIN S17); structural constituent of ribosome	260165_at	1.09561	1.582	0.000569459	0.00948822	8.23607	7.6853	8.40572	9.20226	9.20702	7.54801	7.89873	9.00121	9.63564	9.63589	9.92243
At3g46940	deoxyuridine 5'-triphosphate nucleotidohydrolase family	252442_at	1.08968	1.84799	1.63917e-05	0.00102437	6.10043	5.94821	6.04732	7.25622	6.98711	5.65851	5.83742	6.55899	7.96425	7.4605	8.17416
At5g49360	ATBXL1__BXL1 (BETA-XYLOSIDASE 1); hydrolase, hydrolyzing O-glycosyl compounds	248622_at	1.08741	-0.999575	0.00226985	0.0236208	5.78583	6.41184	6.14828	7.16735	7.23811	9.11202	10.0496	9.88059	8.50424	8.29958	9.23971
At5g04530	KCS19 (3-KETOACYL-COA SYNTHASE 19); acyltransferase/ catalytic/ transferase, transferring acyl groups other than amino-acyl groups	250891_at	1.08639	1.86249	0.00621388	0.0461088	4.11261	4.43816	4.41997	5.12127	5.69867	3.95307	4.12705	5.1035	6.46744	4.9763	7.32736
At5g66400	ATDI8__RAB18 (RESPONSIVE TO ABA 18)	247095_at	1.068	-1.49314	0.0130692	0.07579	7.71941	7.56436	7.76629	8.58449	8.91822	12.1242	10.5678	9.75405	8.78198	9.43844	9.74619
At3g02120	hydroxyproline-rich glycoprotein family protein	258859_at	1.05776	2.3843	0.00018756	0.0046909	4.90744	5.09158	4.59725	6.02867	5.81769	3.99816	4.60227	5.82615	7.39919	6.7355	7.44477
At1g65230	unknown protein	263142_at	1.05325	1.03013	0.000193559	0.00477822	5.28541	5.26675	5.2359	6.18912	6.44276	6.4401	6.03489	6.11752	7.7169	6.75912	7.20686
At2g29180	unknown protein	266285_at	1.05089	0.991337	0.000845932	0.0124088	4.52653	5.1324	4.87118	6.05775	5.73076	5.06543	4.55797	5.547	5.78011	6.10475	6.25955
At3g62030	ROC4__peptidyl-prolyl cis-trans isomerase, chloroplast / cyclophilin / rotamase / cyclosporin A-binding protein (ROC4)	251305_at	1.05015	1.14064	7.65028e-05	0.00273515	9.41373	9.71812	9.34629	10.4057	10.6801	10.3546	10.1959	10.4012	11.78	10.9641	11.6294
At3g20270	lipid-binding serum glycoprotein family protein	257666_at	1.041	2.55788	1.43955e-08	1.02613e-05	7.63302	7.69018	7.67007	8.69964	8.71121	6.55746	6.09086	6.25735	9.14139	8.64924	8.78867
At5g53710	unknown protein	248218_at	1.03343	1.31736	0.000103175	0.00329612	5.35882	5.18033	5.39796	6.64154	6.05006	5.42111	5.2054	5.81975	6.36229	7.04314	6.99292
At4g22690 At4g22710	CYP706A1; electron carrier/ heme binding / iron ion binding / monooxygenase/ oxygen binding	254331_s_at	1.03191	1.42862	2.53635e-05	0.0013239	6.29533	6.37015	6.18755	7.0979	7.5346	5.41119	5.08191	4.91991	6.19321	6.9645	6.54115
At5g52970	thylakoid lumen 15.0 kDa protein	248287_at	1.02518	1.25911	1.10288e-05	0.000808898	6.4132	6.1783	6.36634	7.28784	7.40109	6.504	6.43478	6.51129	8.08796	7.32113	7.81833
At5g40960	unknown protein	249329_at	1.02513	1.91355	0.00075591	0.0114672	9.48402	9.37649	9.9417	10.892	10.3597	8.34235	8.36621	9.82035	10.2996	11.1478	10.8221
At5g59320	LTP3 (LIPID TRANSFER PROTEIN 3); lipid binding	247717_at	1.02404	1.06507	0.000797208	0.0118929	9.18481	9.32422	9.33643	10.1109	10.5009	10.7293	10.1001	10.1354	11.4622	10.8305	11.8673
At5g66530	aldose 1-epimerase family protein	247101_at	1.02127	1.00622	6.89325e-05	0.00258186	7.69095	7.87818	7.81092	8.73639	8.89285	8.14379	8.75761	8.52683	9.793	9.18294	9.47093
At1g09510	cinnamyl-alcohol dehydrogenase family / CAD family	264554_at	1.0077	0.997457	0.00014133	0.00398485	5.86429	5.70996	5.52265	6.50449	6.90885	5.67479	5.53378	5.97665	6.8716	6.98029	6.32569
At2g20875	EPF1 (EPIDERMAL PATTERNING FACTOR 1)	257396_at	1.00584	1.47165	0.000632957	0.0101818	6.9046	6.35834	6.82046	7.98987	7.41075	6.23899	6.5229	7.16878	7.60616	8.61298	8.12647
At2g40030	ATNRPD1B_DMS5_DRD3_NRPE1__NRPD1B; DNA binding / DNA-directed RNA polymerase	267350_at	1.0035	1.08182	0.000923602	0.0130853	5.63342	5.89478	6.27256	6.95921	6.91498	6.35352	6.11536	6.7458	7.32606	8.05554	7.07856
At3g56910	PSRP5 (PLASTID-SPECIFIC 50S RIBOSOMAL PROTEIN 5)	246294_at	1.00346	0.998668	4.1326e-05	0.00183822	9.23451	9.09827	9.17576	10.0189	10.3271	9.47462	9.39701	10.0648	10.7072	10.5345	10.6907
At1g28070	INVOLVED IN: biological_process unknown; LOCATED IN: cellular_component unknown; EXPRESSED IN: 23 plant structures; EXPRESSED DURING: 15 growth stages; BEST Arabidopsis thaliana protein match is: protein binding (TAIR:AT2G33510.1); Has 40 Blast hits to 35	259583_at	0.993072	1.24615	0.00345631	0.0309674	4.58326	4.8977	5.29123	5.93621	5.89807	4.45266	4.50307	5.72018	5.64368	6.37419	6.39648
At5g01800	saposin B domain-containing protein	251074_at	-0.960111	-1.12689	1.50446e-05	0.000978368	10.204	10.5142	10.1966	9.24832	9.44131	10.3243	10.1969	9.71487	8.98329	8.92823	8.94389
At3g27300	G6PD5 (glucose-6-phosphate dehydrogenase 5); glucose-6-phosphate dehydrogenase	257144_at	-0.960713	-1.16668	0.00898371	0.0593221	8.36872	8.5732	8.10439	7.08291	7.69319	8.73107	8.14895	7.15154	7.36599	6.68308	6.48245
At2g05580	unknown protein	265567_at	-0.963083	-2.12151	4.72786e-05	0.00199339	13.2517	12.9153	12.9412	12.2349	11.911	12.8927	12.4842	11.8813	9.81516	10.8838	10.1947
At3g23050	AXR2__IAA7 (INDOLE-3-ACETIC ACID 7); transcription factor	257769_at	-0.963252	-1.37039	0.0027685	0.0268265	7.03083	7.97341	7.09925	6.43282	6.37634	7.58386	7.00687	6.08795	5.43611	5.69378	5.43763
At5g05600	oxidoreductase, 2OG-Fe(II) oxygenase family protein	250793_at	-0.964738	-1.02529	8.59102e-05	0.00295567	8.12319	8.55912	8.60731	7.44877	7.4815	7.79199	7.52453	7.89774	6.47453	6.58845	7.07542
At5g12110	elongation factor 1B alpha-subunit 1 (eEF1Balpha1)	250304_at	-0.964848	-1.52767	0.00585064	0.0441851	8.94361	8.76008	8.54108	7.58677	7.98005	10.1331	9.60909	8.3472	8.515	7.66282	7.32861
At5g56140	KH domain-containing protein	247994_at	-0.96495	-1.47497	0.00166358	0.019419	8.66567	9.33214	8.32194	7.63869	7.97791	9.43498	9.41447	8.14912	7.49283	7.49507	7.58574
At3g10910 At3g10912	zinc finger (C3HC4-type RING finger) family protein	258757_at	-0.965039	-1.56006	0.0104582	0.0656443	7.81982	7.56941	8.14777	7.18022	6.58103	7.96883	6.66603	8.20492	5.10488	6.23134	6.82336
At5g04370	NAMT1; S-adenosylmethionine-dependent methyltransferase	245713_at	-0.971389	-2.26299	0.000115829	0.00350871	6.69213	6.6481	6.57627	5.3327	6.00219	8.08343	7.10672	6.67266	4.53836	5.49117	5.0443
At1g72450	TIFY11B__JAZ6 (JASMONATE-ZIM-DOMAIN PROTEIN 6)	260429_at	-0.973725	-1.23482	3.43136e-06	0.000387557	6.12329	6.345	6.35591	5.50842	5.09359	5.50842	5.86871	5.87912	4.41925	4.57796	4.55457
At4g19410	pectinacetylesterase, putative	254578_at	-0.976348	-1.1098	7.94056e-06	0.000663459	10.6599	10.5917	10.6218	9.63055	9.66573	10.5394	10.1809	9.89974	8.95598	9.18798	9.14665
At1g76990	ACR3; amino acid binding	264956_at	-0.983206	-1.14325	0.00174699	0.0201562	9.17822	9.10091	8.74604	7.82732	8.22305	9.03611	9.39091	8.05887	7.63657	7.85429	7.56528
At3g27610	FUNCTIONS IN: molecular_function unknown; INVOLVED IN: biological_process unknown; LOCATED IN: cellular_component unknown; EXPRESSED IN: 22 plant structures; EXPRESSED DURING: 13 growth stages; BEST Arabidopsis thaliana protein match is: nucleotidyltransf	258228_at	-0.986023	-1.16853	9.24644e-06	0.000716234	5.28557	5.30445	5.14818	4.20374	4.31634	5.66117	5.30838	5.15994	4.27445	4.41635	3.93308
At1g64300	protein kinase family protein	259740_at	-0.995842	-0.974753	9.11857e-06	0.000715095	5.25412	5.43634	5.28571	4.3049	4.3542	5.59318	5.42124	5.37337	4.59549	4.69964	4.16841
At2g36320	zinc finger (AN1-like) family protein	263901_at	-0.997103	-1.35243	0.000152465	0.00413522	7.65834	7.80653	7.89757	6.98475	6.59601	7.54523	7.38952	7.88422	5.98955	5.92042	6.85173
At1g54540	FUNCTIONS IN: molecular_function unknown; INVOLVED IN: biological_process unknown; LOCATED IN: cellular_component unknown; EXPRESSED IN: hypocotyl, flower, root; EXPRESSED DURING: petal differentiation and expansion stage; CONTAINS InterPro DOMAIN/s: Harp	263005_at	-1.00041	-1.70009	2.18003e-05	0.00120989	9.28787	9.33534	9.66847	8.17661	8.68368	8.79115	8.68368	8.70148	6.48584	7.41142	7.17877
At1g79520	cation efflux family protein	262940_at	-1.00166	-1.54743	1.94402e-05	0.00114581	7.74321	7.95358	7.93564	7.02631	6.72532	8.36314	7.58457	7.91848	6.51852	6.64136	6.064
At1g26820	RNS3 (RIBONUCLEASE 3); RNA binding / endoribonuclease/ ribonuclease T2	263689_at	-1.00934	-1.4577	8.93846e-05	0.00302951	11.822	11.971	11.9068	10.8906	10.8906	11.2966	10.8587	10.7852	8.89238	9.86387	9.81116
At2g38480	integral membrane protein, putative	267038_at	-1.00997	-1.00237	3.50435e-06	0.00038803	9.1624	9.26127	9.28146	8.28419	8.16595	8.6341	8.35725	8.73985	7.42639	7.7779	7.51981
248544_at	0	248544_at	-1.01179	-1.39597	0.000295754	0.00621193	10.1815	10.061	9.99949	9.07855	9.05921	10.3591	9.95525	9.36347	8.11903	9.03567	8.33518
At1g62250	unknown protein	264738_at	-1.01459	-1.07657	8.51819e-08	3.03594e-05	7.913	7.96106	7.87254	6.94239	6.8595	8.64359	8.45993	8.64433	7.50637	7.49612	7.51566
At2g02580	CYP71B9; electron carrier/ heme binding / iron ion binding / monooxygenase/ oxygen binding	267267_at	-1.0161	-1.06262	1.25337e-05	0.000863724	8.46406	8.22047	8.65364	7.46368	7.39622	7.76711	7.46256	7.69007	6.5343	6.35609	6.84148
At1g47128	RD21A__RD21 (responsive to dehydration 21); cysteine-type endopeptidase/ cysteine-type peptidase	245803_at	-1.02004	-1.4405	0.000907034	0.0128987	10.3021	10.6251	10.4852	9.36656	9.53498	10.4107	10.345	9.47445	8.04406	9.29601	8.5685
At1g50290	unknown protein	262421_at	-1.02413	-5.56723	7.89779e-11	6.00495e-07	4.72869	4.88963	5.07021	3.90172	3.84237	9.4478	9.08088	8.85396	3.45985	3.90263	3.31847
At3g14450	CID9 (CTC-Interacting Domain 9); RNA binding / protein binding	257275_at	-1.02685	-1.30344	4.47594e-05	0.00191743	8.00788	8.26601	8.28106	7.08472	7.23155	7.6008	8.00539	7.89251	6.02441	6.84223	6.72174
At5g57240	ORP4C (OSBP(OXYSTEROL BINDING PROTEIN)-RELATED PROTEIN 4C); oxysterol binding	247951_at	-1.04224	1.458	4.12125e-05	0.00183822	8.70952	8.42382	8.61204	7.53695	7.54216	5.09865	4.94692	5.25396	5.95776	6.80869	6.90707
At5g11930	glutaredoxin family protein	250344_at	-1.04368	-1.27575	3.60912e-05	0.00168732	7.71054	7.68577	7.60119	6.73771	6.5066	7.84981	8.53519	8.2221	7.12445	7.11664	6.53877
At2g19900	ATNADP-ME1 (NADP-malic enzyme 1); malate dehydrogenase (oxaloacetate-decarboxylating) (NADP+)/ malic enzyme/ oxidoreductase, acting on NADH or NADPH, NAD or NADP as acceptor	266690_at	-1.05653	-1.50357	0.00548712	0.0422374	9.74074	9.71309	9.49041	8.26826	8.91484	10.3167	10.057	8.41881	8.37117	7.70531	8.20529
At3g16190	isochorismatase hydrolase family protein	258052_at	-1.05741	-0.985593	0.00433535	0.0360647	11.1521	11.7101	11.1888	9.96314	10.6227	11.3326	10.9378	10.5337	10.5472	9.40333	9.89681
At3g14560	unknown protein	258091_at	-1.05826	-1.21176	0.000131089	0.00378773	10.0775	9.71489	10.0467	8.9163	8.85989	9.53059	8.91625	9.5848	7.70354	8.4545	8.23831
At5g54470	zinc finger (B-box type) family protein	248160_at	-1.06343	1.46926	7.91859e-06	0.000663459	7.21374	7.24072	7.01539	6.14339	6.04298	4.50096	4.27665	4.74432	6.37256	5.92256	5.63459
At5g02230	haloacid dehalogenase-like hydrolase family protein	251028_at	-1.06428	-2.18307	5.34129e-09	7.16675e-06	10.5881	10.7038	10.4958	9.52375	9.53947	11.8328	11.8638	11.5206	9.44596	9.57676	9.64521
At3g16750	unknown protein	258424_at	-1.06627	-1.29766	1.83272e-06	0.000259975	4.38202	4.69494	4.33079	3.26262	3.54334	4.74349	4.98233	4.81942	3.43852	3.43835	3.77538
At1g05850	CTL1_ELP_ELP1_ERH2_HOT2__POM1 (POM-POM1); chitinase	261279_at	-1.06848	-1.1132	4.36085e-05	0.00189724	12.4961	12.7431	12.3858	11.2989	11.6474	12.4001	12.4484	11.7735	11.1208	10.9759	11.1857
At1g69530	AT-EXP1_ATEXP1_ATHEXP ALPHA 1.2_EXP1__ATEXPA1 (ARABIDOPSIS THALIANA EXPANSIN A1)	256299_at	-1.07942	-1.62214	0.00964197	0.0620632	9.80787	9.86012	9.42998	8.27906	8.96075	8.61433	10.1915	8.2102	6.91431	8.20387	7.03144
At1g01560	ATMPK11; MAP kinase/ kinase	259428_at	-1.0874	-1.47561	0.000124254	0.0036932	5.40346	5.77647	5.42335	4.2507	4.64335	6.28976	5.47713	5.36539	3.91188	4.56567	4.22791
At1g11450 At1g11460	nodulin MtN21 family protein	261868_s_at	-1.09032	-1.91425	9.02991e-09	7.90635e-06	4.4141	4.54277	4.46	3.46052	3.30341	5.12802	5.27704	5.0726	3.36585	3.30386	3.06521
At2g40670	RR16__ARR16 (ARABIDOPSIS RESPONSE REGULATOR 16); transcription regulator/ two-component response regulator	266078_at	-1.09115	-1.25874	0.000497634	0.00863197	9.63125	9.57873	9.5269	8.4945	8.48112	8.45643	7.96076	8.34545	6.3239	7.65297	7.00954
At1g12010	1-aminocyclopropane-1-carboxylate oxidase, putative / ACC oxidase, putative	264346_at	-1.09613	-1.0472	0.000480884	0.00841825	12.5347	13.0081	12.2706	11.3408	11.6759	12.1815	12.5739	11.7547	11.2855	11.2573	10.8257
At1g21450	SCL1 (SCARECROW-LIKE 1); transcription factor	260878_at	-1.09646	-1.24403	0.000842933	0.0123728	6.92443	7.57595	7.17316	5.73744	6.51866	7.69946	7.7252	6.75001	6.19926	5.9997	6.24363
At4g31890	armadillo/beta-catenin repeat family protein	253498_at	-1.09946	-1.36837	0.00887672	0.0587574	6.3108	6.37073	6.07142	4.74504	5.558	5.74564	7.13403	5.25747	4.85242	5.04255	4.13706
At3g58450	universal stress protein (USP) family protein	251580_at	-1.10301	-1.73682	0.0072447	0.0510281	8.68487	8.67409	8.67012	7.59116	7.55553	10.5225	8.42006	8.22984	6.82191	7.4726	7.66741
At1g70700	JAZ9__TIFY7	260205_at	-1.11266	-2.20097	8.22567e-06	0.000674919	8.16639	8.67525	8.07222	7.04989	7.33403	8.43967	8.79132	7.8182	5.81601	6.32152	6.30873
At1g14930	major latex protein-related / MLP-related	262857_at	-1.12298	-2.22551	0.000260787	0.00569784	8.86909	9.06475	8.89641	7.78344	7.85743	8.74268	7.20735	7.02564	4.95083	5.6701	5.6782
At1g10730	clathrin adaptor complexes medium subunit family protein	262787_at	-1.12906	-1.20671	0.000486282	0.00849968	6.39572	6.79977	6.3498	5.22063	5.55145	6.87646	6.79145	5.79638	5.39268	5.03372	5.41774
At5g49280	hydroxyproline-rich glycoprotein family protein	248592_at	-1.12966	-1.51251	0.000122943	0.00367059	10.5802	11.0619	10.5351	9.27202	9.92017	10.1817	10.3736	9.51269	8.83109	8.36526	8.33414
At3g52470	harpin-induced family protein / HIN1 family protein / harpin-responsive family protein	252058_at	-1.13257	-1.60935	0.000557685	0.00934666	6.90453	7.50767	7.00869	5.81745	6.198	7.29712	7.35355	6.25674	5.63405	5.66662	4.7787
At1g10090	unknown protein	264515_at	-1.149	-1.2701	7.12612e-06	0.000620577	6.3479	6.7618	6.27719	5.4537	5.17289	6.51766	6.5334	6.17639	5.26714	5.25024	4.89977
At3g02150	TCP13_TFPD__PTF1 (PLASTID TRANSCRIPTION FACTOR 1); transcription factor	259129_at	-1.15503	-1.19736	0.00143522	0.0177077	6.27051	6.64981	6.08858	5.08778	5.27475	6.26035	6.24539	5.19413	4.17436	5.04818	4.88525
At5g40670	PQ-loop repeat family protein / transmembrane family protein	249373_at	-1.16712	-1.72801	0.000225457	0.00523693	9.1093	9.31912	9.03056	7.6901	8.28165	10.1002	9.74583	8.88638	8.1274	7.34158	8.07941
At1g34580	monosaccharide transporter, putative	261181_at	-1.17675	-1.33836	2.92051e-05	0.00147057	6.2501	6.25235	6.1183	5.0974	4.96293	6.38175	5.96474	6.73183	4.63072	5.13451	5.29801
At3g12955	auxin-responsive protein-related	257859_at	-1.1848	1.62877	0.000254293	0.00563149	7.11813	7.36444	7.46513	6.40828	5.85392	5.69439	4.70422	5.6544	6.75591	6.64607	7.53734
At1g26930	kelch repeat-containing F-box family protein	263680_at	-1.18562	-1.39792	0.000113368	0.00347104	8.22052	7.63619	8.33979	7.12525	6.63451	8.55255	8.57454	8.74613	6.71018	7.36882	7.60048
At5g24270	CBL4__SOS3 (SALT OVERLY SENSITIVE 3); calcium ion binding / calcium-dependent protein serine/threonine phosphatase	249783_at	-1.18617	-1.03372	4.70285e-06	0.000474655	7.27041	7.28284	7.2802	6.02636	6.15693	6.56337	6.98114	6.44067	5.44993	5.80818	5.62591
At3g17860	JAI3_TIFY6B__JAZ3 (JASMONATE-ZIM-DOMAIN PROTEIN 3)	258189_at	-1.18782	-1.36604	2.01342e-05	0.00117052	8.62268	8.77738	8.25952	7.34183	7.38893	7.97412	7.79863	7.15741	6.33956	6.30762	6.18487
At1g61720	BAN (BANYULS); oxidoreductase	264401_at	-1.18812	-1.60539	4.14457e-05	0.00183925	8.31886	8.63084	8.22912	7.13464	7.27501	8.88751	8.79017	8.96934	7.00515	6.87216	7.95353
At2g28900	ATOEP16-L_OEP16__ATOEP16-1 (OUTER PLASTID ENVELOPE PROTEIN 16-1); P-P-bond-hydrolysis-driven protein transmembrane transporter/ protein transporter	266225_at	-1.19658	2.2453	6.75889e-09	7.34144e-06	11.6778	11.7669	11.571	10.5076	10.4431	7.38905	7.14624	7.49055	9.66156	9.38715	9.71304
At3g23340	ckl10 (Casein Kinase I-like 10); ATP binding / kinase/ protein kinase/ protein serine/threonine kinase	258300_at	-1.20464	-1.6279	0.000130624	0.00378594	6.7784	6.49032	6.66242	5.53078	5.34737	7.96578	7.28431	7.06578	5.16771	6.11712	6.14733
At3g23570	dienelactone hydrolase family protein	258108_at	-1.20501	-1.36946	0.00382026	0.033108	10.8397	11.1164	10.5618	9.27539	9.99316	10.1478	10.2542	8.828	8.94747	7.90072	8.27336
At2g36830	GAMMA-TIP1_TIP1;1__GAMMA-TIP (GAMMA TONOPLAST INTRINSIC PROTEIN); water channel	263867_at	-1.21023	-1.19701	0.00039873	0.00748563	7.29207	7.88489	7.84404	6.70867	6.21821	8.58501	9.48557	9.56624	8.175	8.03747	7.83332
At3g08860	alanine--glyoxylate aminotransferase, putative / beta-alanine-pyruvate aminotransferase, putative / AGT, putative	258983_at	-1.22184	-1.28753	0.00266731	0.0262115	11.1416	11.2936	10.7906	9.7398	9.96707	10.1691	9.86952	8.74484	7.87463	8.91738	8.12887
At1g19700	BLH10__BEL10 (BEL1-LIKE HOMEODOMAIN 10); DNA binding / transcription factor	261139_at	-1.23745	-1.28877	4.43047e-07	0.000104184	7.05836	7.09137	7.36929	6.05628	5.81484	6.56155	6.43478	6.76962	5.34729	5.17913	5.37323
At5g45690	unknown protein	248915_at	-1.23757	-2.32181	0.000142418	0.00398908	12.2514	12.4655	12.1418	10.6956	11.4017	12.2846	11.849	10.9776	8.83784	10.1175	9.19043
At1g09155	AtPP2-B15 (Phloem protein 2-B15); carbohydrate binding	264263_at	-1.24036	-2.68515	1.67962e-08	1.16098e-05	7.24418	6.94439	7.03934	5.85145	5.81976	8.23345	7.61607	7.80316	5.31381	5.00989	5.27353
At4g04020 At4g22240	FIB (FIBRILLIN); structural molecule	255364_s_at	-1.24074	-1.34781	0.000439294	0.00794	8.32894	8.52058	8.18776	6.80624	7.40381	8.92413	8.92407	7.89077	7.65084	7.01678	7.02792
At4g16770	iron ion binding / oxidoreductase/ oxidoreductase, acting on paired donors, with incorporation or reduction of molecular oxygen, 2-oxoglutarate as one donor, and incorporation of one atom each of oxygen into both donors	245307_at	-1.242	-2.41225	9.7053e-09	7.90635e-06	8.67445	8.5798	8.49857	7.36653	7.31802	9.13079	9.39625	8.92098	6.67744	6.94783	6.58601
At1g70810	C2 domain-containing protein	262314_at	-1.24739	-1.07747	0.00140706	0.0174663	9.7617	9.93048	9.56378	8.28167	8.72751	9.3387	8.44176	8.23613	8.05641	7.61245	7.11534
At2g43535	trypsin inhibitor, putative	260549_at	-1.25061	-1.62363	5.30243e-06	0.000510908	10.9708	10.4499	10.9136	9.54493	9.51006	9.61075	9.33733	10.1224	7.94591	8.17122	8.08243
At1g16850	unknown protein	256114_at	-1.25085	-2.33795	0.000423292	0.00774904	7.62894	6.88918	7.97865	6.42424	6.07192	8.22331	8.35329	9.38675	5.40386	6.6776	6.86805
At5g19580	glyoxal oxidase-related	245946_at	-1.25136	-1.02019	0.0018184	0.0206666	8.16215	7.07956	7.86768	6.50979	6.39375	7.48824	6.65808	7.04719	5.89634	6.51672	5.71989
At5g43860	ATCLH2; chlorophyllase	249091_at	-1.25572	-1.40509	2.87825e-05	0.00145572	8.083	8.23859	7.5969	6.72039	6.71383	7.90705	8.27365	7.42787	6.30785	6.61764	6.4678
At2g37460	nodulin MtN21 family protein	265962_at	-1.26651	-1.03183	3.81369e-05	0.00174329	11.7857	12.0879	11.6846	10.3113	10.8612	11.1924	11.4517	10.8462	10.2806	10.1214	9.99282
At4g21680	proton-dependent oligopeptide transport (POT) family protein	254396_at	-1.26747	-1.04154	5.23687e-06	0.00050831	10.6975	10.768	10.7538	9.53223	9.41236	10.4087	9.94172	10.2352	9.14407	8.88732	9.42964
At3g52370	FLA15 (FASCICLIN-LIKE ARABINOGALACTAN PROTEIN 15 PRECURSOR)	256673_at	-1.26812	-1.10198	0.000650127	0.0103623	10.9613	10.9263	10.8893	9.48832	9.82675	10.5442	10.4529	9.57176	8.8962	9.62755	8.73919
At3g13510	unknown protein	256960_at	-1.27069	-1.85225	0.000265341	0.00576678	9.42901	9.24682	9.18632	7.74107	8.29231	9.76921	9.9853	8.69692	8.2108	7.50487	7.17903
At5g22500	FAR1 (FATTY ACID REDUCTASE 1); fatty acyl-CoA reductase (alcohol-forming)/ oxidoreductase, acting on the CH-CH group of donors	249895_at	-1.27559	-1.10609	0.000145591	0.00403901	10.8267	10.6307	10.836	9.35307	9.62469	9.97525	9.81025	9.06323	8.25603	8.85633	8.41809
At2g32190 At2g32210	unknown protein	265670_s_at	-1.29361	-1.01118	2.95027e-05	0.00147912	10.473	10.5958	10.7317	9.53019	9.08291	8.9675	8.4357	8.84743	7.4355	7.82229	7.9593
At3g24530	AAA-type ATPase family protein / ankyrin repeat family protein	258134_at	-1.30407	-1.30549	4.22499e-05	0.00185331	7.36893	7.24554	7.13805	5.44813	6.44539	6.99542	6.81453	6.71751	5.6892	5.63011	5.29167
At3g06360	AtAGP27__AGP27	258914_at	-1.30838	1.06789	0.00324946	0.0296956	9.23683	8.58192	9.72036	8.21351	7.52914	5.12343	5.4093	6.12956	6.20831	7.00268	6.65499
At2g17850	FUNCTIONS IN: molecular_function unknown; INVOLVED IN: aging; LOCATED IN: endomembrane system; EXPRESSED IN: 9 plant structures; EXPRESSED DURING: 9 growth stages; CONTAINS InterPro DOMAIN/s: Rhodanese-like (InterPro:IPR001763); BEST Arabidopsis thaliana	264846_at	-1.31186	1.48824	0.000941809	0.013302	9.07328	9.13125	9.51691	7.46694	8.3903	5.93471	5.07082	5.09462	6.23959	6.86175	7.46353
At1g72150	PATL1 (PATELLIN 1); transporter	259803_at	-1.31673	-1.67517	2.7896e-05	0.00142907	9.54219	9.66434	9.22637	7.93888	8.38293	8.93639	9.89413	8.90575	7.48939	7.6136	7.60777
At3g15670	late embryogenesis abundant protein, putative / LEA protein, putative	258224_at	-1.31738	-2.62	0.00252304	0.0252858	10.3161	10.3866	10.2846	8.46735	9.55613	12.0491	10.325	8.97092	7.4877	7.95549	8.04183
At3g19920	unknown protein	257994_at	-1.31811	-2.22367	9.11129e-05	0.00306532	9.01213	8.82694	9.04671	7.65286	7.63476	9.35011	8.441	8.50955	5.63985	7.00618	6.98362
At2g42270	U5 small nuclear ribonucleoprotein helicase, putative	267627_at	-1.35328	-1.35245	1.51366e-06	0.000230177	5.92429	5.78045	5.78045	4.47818	4.47205	5.64441	5.4861	5.79485	4.0543	4.13338	4.68033
At3g13672	seven in absentia (SINA) family protein	256789_at	-1.36473	-1.17854	7.36584e-08	2.89177e-05	9.22697	9.39557	9.38263	8.05977	7.88089	8.47086	8.20748	8.2556	7.05497	7.20364	7.13973
At2g31990	exostosin family protein	265728_at	-1.36939	-0.958147	7.60537e-05	0.00273194	8.89224	9.01316	8.75023	7.29494	7.7367	8.27648	8.37696	7.57029	6.92219	7.2709	7.1562
At1g08630	THA1 (Threonine Aldolase 1); aldehyde-lyase/ threonine aldolase	264777_at	-1.38576	-1.65584	0.000452766	0.00810008	10.0625	10.5312	10.0379	8.44294	9.20662	10.3685	10.5403	9.20121	8.61121	8.55291	7.97841
At3g15510	ANAC056_NARS1__ATNAC2 (ARABIDOPSIS NAC DOMAIN CONTAINING PROTEIN 2); transcription factor	258385_at	-1.39225	-1.91503	3.97084e-06	0.000415481	9.38085	9.65045	9.35294	7.855	8.28332	8.67686	9.3072	8.41638	6.86289	7.12031	6.67215
At5g40540	protein kinase, putative	249361_at	-1.40543	-1.48836	2.81967e-05	0.00143574	8.36938	8.3733	8.58575	6.95664	7.11813	7.85856	8.26184	8.23729	6.34394	7.26697	6.2817
At3g26330	CYP71B37; electron carrier/ heme binding / iron ion binding / monooxygenase/ oxygen binding	256875_at	-1.41183	-2.23444	0.000128172	0.00376393	8.07306	7.783	8.44001	6.69297	6.68075	8.62867	7.60074	7.39827	5.37451	6.40994	5.13991
At4g14980	INVOLVED IN: intracellular signaling cascade; EXPRESSED IN: shoot apex, root, seed; EXPRESSED DURING: E expanded cotyledon stage; CONTAINS InterPro DOMAIN/s: Protein kinase C, phorbol ester/diacylglycerol binding (InterPro:IPR002219), DC1 (InterPro:IPR004	245586_at	-1.41285	3.37032	4.55511e-09	6.49389e-06	10.109	10.2101	10.3857	8.75827	8.88594	4.92587	4.35439	4.59136	8.21289	8.09962	7.67007
At1g28600	lipase, putative	262745_at	-1.41475	-1.11869	1.78237e-05	0.00108127	8.74021	9.00432	9.00881	7.19835	7.8077	8.64001	8.3233	8.24486	7.13906	7.10372	7.60931
At4g16140	proline-rich family protein	245479_at	-1.41805	-1.31237	0.00413117	0.0350416	8.69753	8.89033	8.55593	6.94835	7.64474	8.29094	9.07173	7.20559	7.39173	6.8069	6.43251
At2g18370	protease inhibitor/seed storage/lipid transfer protein (LTP) family protein	265334_at	-1.42473	-2.67186	0.00174037	0.0200962	13.0575	13.1889	12.9428	11.6784	11.5983	12.6057	11.4115	10.779	7.39768	9.55957	9.82345
At5g61340	unknown protein	247522_at	-1.42518	-1.10861	0.00293945	0.0279396	9.34408	9.91156	9.43079	7.76634	8.50758	9.17518	8.78965	8.04852	7.8269	6.83339	8.02723
At5g45830	GSQ5__DOG1 (DELAY OF GERMINATION 1)	248911_at	-1.43071	-1.35512	0.00178915	0.0204763	10.7497	11.3126	10.7517	9.00159	10.013	10.5925	10.2798	9.11249	8.84917	8.69393	8.37635
At3g01420	ALPHA-DOX1__DOX1; lipoxygenase	258957_at	-1.4431	-2.6388	0.000742756	0.0113381	10.0361	9.93482	9.80118	8.62383	8.33805	10.1251	10.2595	9.64374	5.82907	8.52631	7.75655
At2g36410	unknown protein	263920_at	-1.44535	-0.986671	1.35856e-05	0.000922282	8.44678	8.71347	8.32678	6.90151	7.19915	7.57953	7.69428	7.10589	6.58312	6.60657	6.23
At1g67070	PMI2__DIN9 (DARK INDUCIBLE 9); mannose-6-phosphate isomerase	255881_at	-1.44589	-1.16366	3.19133e-05	0.00157563	7.41696	7.60412	7.30978	6.01077	5.98469	7.40861	6.75528	6.56985	5.62183	5.54228	6.07865
At3g03910	GDH3 (GLUTAMATE DEHYDROGENASE 3); binding / catalytic/ oxidoreductase/ oxidoreductase, acting on the CH-NH2 group of donors, NAD or NADP as acceptor	259346_at	-1.4593	-1.48117	1.14012e-06	0.000185845	7.99939	7.92751	8.14097	6.68868	6.43796	7.65398	7.01731	7.21988	5.73144	6.03427	5.68195
At3g22840	ELIP1 (EARLY LIGHT-INDUCABLE PROTEIN); chlorophyll binding	258321_at	-1.46492	1.01517	0.0010667	0.0145088	10.4332	10.2436	10.1501	8.83463	8.78684	7.11053	6.34376	6.50647	8.22482	7.91485	6.86661
At1g43590	0	262719_at	-1.46667	0.992723	0.00118466	0.0155567	5.12215	5.83063	6.11651	4.22309	4.22309	4.12486	3.79325	3.55202	4.73855	4.26203	5.44771
At1g59700	ATGSTU16 (GLUTATHIONE S-TRANSFERASE TAU 16); glutathione transferase	262916_at	-1.4742	-1.20291	0.000158032	0.00422096	9.17935	8.60605	8.90465	7.59243	7.25254	9.37783	8.44616	9.25946	8.16632	7.48794	7.82046
At3g23430	PHO1 (phosphate 1)	258293_at	-1.47931	-1.05681	0.000731703	0.0112273	8.08046	8.68436	7.86557	6.69636	6.76528	7.98837	7.70569	6.70968	6.5595	6.38246	6.29135
At1g24350	INVOLVED IN: biological_process unknown; EXPRESSED IN: 24 plant structures; EXPRESSED DURING: 15 growth stages; CONTAINS InterPro DOMAIN/s: Acid phosphatase/vanadium-dependent haloperoxidase related (InterPro:IPR003832); BEST Arabidopsis thaliana protein	264869_at	-1.48056	-1.97725	0.000831479	0.0122441	7.08557	7.60162	7.26747	4.9936	6.68172	7.82357	7.62264	6.89067	6.01799	4.82828	5.55886
At5g04200	AtMC9 (metacaspase 9); cysteine-type peptidase	245697_at	-1.48544	-1.68514	9.69767e-05	0.00320025	9.99348	10.1803	10.0138	8.50673	8.64744	10.3678	9.66116	9.38362	7.57521	8.76889	8.01306
At4g33450	ATMYB69__MYB69 (MYB DOMAIN PROTEIN 69); DNA binding / transcription activator/ transcription factor	253327_at	-1.4952	-1.09758	0.0024513	0.0248507	6.33302	6.90631	6.81941	5.24465	5.13745	6.56561	4.90966	5.14266	4.53654	4.62834	4.16031
At1g17430	hydrolase, alpha/beta fold family protein	261032_at	-1.50677	-1.76911	3.80114e-07	9.33268e-05	11.3542	11.6042	11.3753	9.81172	10.0639	11.0897	11.0903	10.5846	9.29763	9.26947	8.89019
At2g37750	unknown protein	267178_at	-1.50891	-1.58064	3.18796e-05	0.00157563	9.32886	9.14005	9.46698	7.78368	7.82241	8.7459	8.10838	8.67395	6.33235	7.04224	7.41171
At2g34840	coatomer protein epsilon subunit family protein / COPE family protein	267428_at	-1.51556	-2.15317	8.29472e-09	7.90635e-06	5.59219	5.4339	5.75848	4.21226	3.94632	6.26227	6.28126	5.99659	3.97419	3.94221	4.16423
At4g01070	UGT72B1__GT72B1; UDP-glucosyltransferase/ UDP-glycosyltransferase/ transferase, transferring glycosyl groups	255622_at	-1.52025	-1.14614	0.000200305	0.00486577	8.71189	8.56941	8.93958	7.49014	6.94994	8.02707	7.32497	7.42538	5.89296	6.55341	6.89266
At3g52780	ATPAP20__PAP20; acid phosphatase/ protein serine/threonine phosphatase	252004_at	-1.52465	-1.18921	8.23616e-05	0.00287258	10.3584	10.485	10.2512	8.77633	8.90409	9.40177	8.53787	8.26986	7.75734	7.30197	7.58256
At1g62380	ATACO2__ACO2 (ACC OXIDASE 2); 1-aminocyclopropane-1-carboxylate oxidase	260637_at	-1.52841	-1.43358	1.22938e-07	3.89475e-05	12.2479	12.5915	12.2422	10.8218	10.8425	12.4572	12.3471	12.305	11.1515	10.9206	10.7364
At1g28470	SND3__ANAC010 (ARABIDOPSIS NAC DOMAIN CONTAINING PROTEIN 10); transcription activator/ transcription factor	261441_at	-1.53128	-0.980088	0.000396219	0.00746235	9.59377	9.97493	9.43777	7.94154	8.33356	8.96061	8.49234	7.72059	7.51805	7.18929	7.52594
At3g56170	CAN (CA-2+ DEPENDENT NUCLEASE); nuclease	251739_at	-1.55052	-1.17518	0.000686282	0.0107439	9.92527	10.0359	9.73064	7.99652	8.69696	9.48832	8.80502	8.03934	7.90527	7.38727	7.51461
At3g56350	superoxide dismutase (Mn), putative / manganese superoxide dismutase, putative	251731_at	-1.5733	-3.235	1.38249e-05	0.000933272	11.7028	11.4825	11.9948	9.84582	10.461	12.0652	11.0842	10.4849	7.5175	8.64546	7.76626
At2g03980	GDSL-motif lipase/hydrolase family protein	263482_at	-1.59155	-2.92887	3.2525e-05	0.00158748	8.67463	8.33045	8.6394	7.07023	6.84299	8.69012	8.71974	9.62482	5.28367	5.87028	7.09412
At2g41690	HSFB3__AT-HSFB3; DNA binding / transcription factor	245107_at	-1.63162	-0.971317	0.00121544	0.0158172	7.277	6.67363	6.79824	5.25711	5.31223	6.96658	5.50519	5.54878	4.90242	5.06149	5.14268
At5g44700	EDA23__GSO2 (GASSHO 2); ATP binding / protein binding / protein kinase/ protein serine/threonine kinase/ protein tyrosine kinase	249013_at	-1.63847	-1.19831	2.02412e-05	0.00117183	7.53707	7.72642	7.66373	5.67697	6.33089	7.08045	7.36405	7.08834	6.45117	5.86784	5.61888
At4g01140	unknown protein	255608_at	-1.6388	-1.32719	3.78484e-05	0.00174329	6.41256	6.21407	6.5833	5.0189	4.51012	5.93032	6.04766	5.59178	4.05027	4.46337	5.07454
At1g01480	AT-ACC2__ACS2; 1-aminocyclopropane-1-carboxylate synthase	259439_at	-1.65235	-1.51088	3.93296e-05	0.00178352	8.60711	8.15401	8.26249	6.45458	6.92313	7.44614	6.8292	6.27151	5.15068	5.53083	5.3327
At1g17710	phosphatase	259399_at	-1.66025	-1.59247	0.00010578	0.00335118	8.62981	9.215	8.91521	7.1918	7.32771	8.3116	7.35223	7.06887	5.52613	6.20638	6.22277
At1g65290	mtACP2 (mitochondrial acyl carrier protein 2); acyl carrier/ metal ion binding	264162_at	-1.66104	-1.41717	8.71399e-06	0.000694986	9.6528	9.927	9.63062	7.87815	8.27339	9.47815	9.93428	9.72107	8.67806	7.80609	8.39784
At1g07500	unknown protein	261065_at	-1.67085	-0.978004	0.000194893	0.00479567	8.90952	8.66674	8.8131	7.32448	6.92672	8.65902	7.42995	7.73293	6.71261	7.07391	7.10137
At3g58550	protease inhibitor/seed storage/lipid transfer protein (LTP) family protein	251531_at	-1.67092	-3.43043	0.00585922	0.0441981	13.7457	13.7289	13.822	12.3474	11.8418	12.8803	10.6858	11.4188	5.83335	8.75824	10.1021
At1g62200	proton-dependent oligopeptide transport (POT) family protein	264736_at	-1.67557	-1.43153	5.38521e-07	0.000118112	10.2357	9.94707	10.393	8.36703	8.66569	8.87449	8.69793	8.77751	7.06074	7.60835	7.38627
At5g40690	INVOLVED IN: biological_process unknown; EXPRESSED IN: 18 plant structures; EXPRESSED DURING: 10 growth stages; CONTAINS InterPro DOMAIN/s: EF-HAND 1 (InterPro:IPR018247); BEST Arabidopsis thaliana protein match is: unknown protein (TAIR:AT2G41730.1); Has	249377_at	-1.67594	-1.93527	9.28117e-05	0.00310445	8.65386	9.32156	8.9058	6.97074	7.59819	8.45138	8.30573	7.07174	5.82237	6.25345	5.94722
At1g52760	esterase/lipase/thioesterase family protein	260153_at	-1.68547	-2.79802	3.44163e-06	0.000387557	11.367	11.38	11.0424	9.25737	9.89796	11.3045	11.7283	10.3509	8.45897	8.41001	8.12072
At3g60730	pectinesterase family protein	251382_at	-1.68676	-3.91542	2.94902e-06	0.000346738	12.3968	12.1887	12.21	10.5738	10.583	11.9953	11.7146	11.07	6.57168	8.32775	8.13425
At1g68380	unknown protein	260437_at	-1.69712	-1.47294	8.50417e-08	3.03594e-05	12.3783	12.1344	12.2107	10.616	10.472	11.9114	11.6205	11.9302	10.4826	10.4624	10.0983
At1g12550	oxidoreductase family protein	259524_at	-1.70119	-0.990952	3.80508e-07	9.33268e-05	9.19566	9.35394	9.28761	7.77767	7.37809	8.13341	8.32798	8.13881	7.37925	6.99143	7.25665
At3g30720	QQS (QUA-QUINE STARCH)	256940_at	-1.71395	3.77862	3.39888e-07	8.71107e-05	8.9631	8.86675	9.49123	7.50738	7.27878	5.66847	4.7461	6.13244	9.27426	9.54243	9.06617
At1g53730	SRF6 (STRUBBELIG-RECEPTOR FAMILY 6); ATP binding / protein binding / protein kinase/ protein serine/threonine kinase	259958_at	-1.71563	-1.00068	1.96372e-06	0.000265045	10.1313	10.0031	10.0548	8.49008	8.20481	10.0245	9.55804	9.30773	8.63657	8.6974	8.55425
At2g44450	BGLU15 (BETA GLUCOSIDASE 15); catalytic/ cation binding / hydrolase, hydrolyzing O-glycosyl compounds	267388_at	-1.71868	-1.36081	1.46304e-05	0.00096173	12.4382	12.315	12.3028	10.3052	10.9614	11.855	11.6514	10.9177	10.1574	10.0402	10.1441
At4g22680	AtMYB85__MYB85 (myb domain protein 85); DNA binding / transcription activator/ transcription factor	254277_at	-1.76116	-1.30398	2.15073e-05	0.00120626	7.43579	7.01855	7.35246	5.50463	5.51092	6.89003	5.87056	6.03577	5.03902	5.12448	4.72093
At5g18130	unknown protein	250028_at	-1.7709	-1.41728	3.56892e-05	0.0016785	9.52115	9.1151	9.16702	7.83279	7.16092	9.0839	8.24293	8.52698	6.77017	7.46897	7.36283
At5g35960	protein kinase, putative	249676_at	-1.78467	-0.997844	0.00293972	0.0279396	7.67685	7.77905	7.66214	5.49399	6.34869	6.25308	5.7951	4.55168	4.18892	5.11084	4.30658
At5g48100	LAC15__TT10 (TRANSPARENT TESTA 10); copper ion binding / laccase	248735_at	-1.79108	-1.35999	7.62397e-07	0.000143721	12.2946	12.3111	12.2278	10.5486	10.425	11.5534	11.6279	11.9314	10.6261	9.93221	10.4744
At1g70670 At1g70680	caleosin-related family protein	260208_s_at	-1.81458	-1.70839	6.41901e-06	0.000578726	11.8257	12.3822	12.0511	10.0687	10.4749	11.3776	11.1224	10.8328	9.0085	9.90257	9.29658
At2g36670	aspartyl protease family protein	265206_at	-1.82416	-1.33864	0.000312458	0.00642088	9.76741	9.99485	9.55671	8.02018	7.87748	9.30369	8.32919	7.61896	6.97473	7.36091	6.90027
At1g47960	ATC/VIF1__C/VIF1 (CELL WALL / VACUOLAR INHIBITOR OF FRUCTOSIDASE 1); enzyme inhibitor/ pectinesterase/ pectinesterase inhibitor	259616_at	-1.85066	-2.01231	0.000305761	0.00635192	9.61115	9.43722	9.83831	7.78249	7.77397	9.16179	8.45933	9.16318	5.72476	7.38903	7.63356
At1g50590	pirin, putative	261876_at	-1.85552	-2.10963	1.22005e-06	0.000197371	8.25422	8.30337	8.27913	6.4309	6.41588	7.63341	7.07715	6.61611	4.63782	5.11346	5.2465
At3g21370	BGLU19 (BETA GLUCOSIDASE 19); catalytic/ cation binding / hydrolase, hydrolyzing O-glycosyl compounds	256814_at	-1.86573	-1.41675	0.00445596	0.0366536	6.73239	7.50063	6.90759	4.83855	5.52373	7.50281	5.27078	5.52373	4.74821	4.97107	4.32779
At5g65310	ATHB-5__ATHB5 (ARABIDOPSIS THALIANA HOMEOBOX PROTEIN 5); protein homodimerization/ sequence-specific DNA binding / transcription activator/ transcription factor	247191_at	-1.88298	-1.07594	0.000148291	0.00405396	6.54069	6.63616	6.37456	4.58205	4.68626	5.91353	5.65668	5.02277	4.97374	3.77533	4.61607
At3g04150	germin-like protein, putative	258582_at	-1.88829	-2.14711	0.000418099	0.00770614	10.6694	10.1157	10.6286	8.72115	8.44475	10.1197	9.57855	9.40295	6.42399	8.6872	7.54867
At2g43880	polygalacturonase, putative / pectinase, putative	267222_at	-1.90357	-1.20219	7.37095e-06	0.000634458	8.87467	8.34403	8.68734	6.51376	6.94979	6.55746	6.18156	5.76696	4.75111	5.01742	5.13089
At1g75280	isoflavone reductase, putative	256454_at	-1.91445	-2.26521	0.000570467	0.00949807	9.54861	10.1039	9.33285	7.63507	7.85962	10.7078	10.4117	8.65577	8.25184	6.99347	7.73437
At5g46230	unknown protein	248889_at	-1.91528	-1.7104	2.79845e-08	1.60422e-05	10.9821	11.2982	11.3165	9.08281	9.48448	9.44161	9.67513	9.51689	7.89809	7.69433	7.91
At5g26120	ATASD2__ASD2 (ALPHA-L-ARABINOFURANOSIDASE 2); alpha-N-arabinofuranosidase/ hydrolase, acting on glycosyl bonds	246874_at	-1.9294	-2.58627	5.20751e-07	0.000115511	9.49626	9.76337	9.39549	7.5519	7.69272	10.0151	9.62764	8.90866	7.00828	6.66187	7.12245
At1g44800	nodulin MtN21 family protein	261335_at	-1.95263	-1.25972	8.78002e-05	0.00298914	10.4592	11.2537	10.5224	8.51194	9.07305	9.62911	9.79241	8.74462	8.00313	8.34413	8.03971
At1g15180	MATE efflux family protein	262569_at	-1.95561	-3.01972	1.29449e-06	0.000205051	7.08887	7.08867	7.04819	4.9668	5.27246	8.10307	8.42897	6.97823	5.07877	4.64297	4.72936
At3g16280	DNA binding / transcription factor	259374_at	-1.97492	-1.79871	7.15226e-05	0.00262714	9.12032	9.3281	8.84458	7.06095	7.18455	7.93869	7.19803	6.38412	5.03825	5.2563	5.83016
At5g44260	zinc finger (CCCH-type) family protein	249065_at	-1.97866	-1.95326	0.000376936	0.00720497	7.41557	7.17662	7.20669	5.36661	5.20866	9.16711	8.22117	6.98105	5.74413	6.54531	6.22012
At3g05170	phosphoglycerate/bisphosphoglycerate mutase family protein	259352_at	-2.00358	-2.11629	1.3599e-07	4.19179e-05	5.72089	5.85576	5.85794	3.80253	3.81338	5.90577	6.4976	6.49434	3.81388	4.44115	4.2938
266155_at	0	266155_at	-2.00732	-2.20945	1.76803e-07	5.10492e-05	6.47649	6.11344	6.64532	4.58453	4.22432	5.85295	5.63823	6.12076	3.46129	4.01917	3.50311
At2g18360	hydrolase, alpha/beta fold family protein	265341_at	-2.03598	-1.81261	1.14065e-06	0.000185845	12.1328	12.2295	12.0035	10.0166	10.1553	10.6685	10.1553	9.73972	8.03695	8.59664	8.49207
At3g26070 At3g26080	plastid-lipid associated protein PAP / fibrillin family protein	258071_s_at	-2.08114	-1.86679	4.68858e-07	0.000108027	9.5497	9.78226	9.46585	7.67711	7.35915	9.99643	9.72656	9.25009	8.07716	7.50744	7.78811
At3g51810	AT3_ATEM1_GEA1__EM1 (LATE EMBRYOGENESIS ABUNDANT 1)	246299_at	-2.09631	-0.982761	0.0149192	0.0825785	8.70835	8.53633	9.0118	6.98072	6.33098	8.18014	5.97041	5.49011	4.95069	5.54442	6.19727
At5g13400	proton-dependent oligopeptide transport (POT) family protein	250261_at	-2.09974	-1.35757	7.08322e-07	0.000136922	7.33999	7.11113	7.43703	5.45456	4.93805	6.49708	6.87651	6.93097	5.19186	5.3254	5.71461
At5g67210	unknown protein	247030_at	-2.12978	-0.977049	7.47706e-05	0.00270288	7.94438	7.77591	7.90104	5.95096	5.53702	6.81896	5.69378	5.51297	5.08632	4.80201	5.20625
At5g50315	0	248510_at	-2.13204	-2.02585	1.49188e-05	0.000975063	8.29396	8.47351	8.34433	6.28788	6.18923	8.67699	7.63335	7.25219	5.60031	5.60542	6.27925
At5g66985	unknown protein	247024_at	-2.14863	-1.07601	6.13502e-05	0.00237597	10.148	9.35608	10.1589	7.73253	7.74555	8.90324	7.91409	8.08231	6.99421	7.07419	7.60321
At1g60970	clathrin adaptor complex small chain family protein	259728_at	-2.15042	-2.21439	9.40493e-10	2.22213e-06	10.6581	10.6073	10.6178	8.6831	8.2715	10.8524	10.5964	10.6683	8.53898	8.52279	8.41217
At2g41380	embryo-abundant protein-related	266368_at	-2.22515	-2.013	5.68183e-08	2.40005e-05	7.08118	6.72668	6.95305	4.8556	4.53469	6.52569	6.73109	6.14678	4.52111	4.63414	4.20933
At4g09610	GASA2 (GAST1 PROTEIN HOMOLOG 2)	255049_at	-2.24793	-3.162	3.89335e-06	0.000411145	8.33146	7.76295	8.49303	6.03136	5.86441	8.70976	7.03455	7.86494	4.33503	5.02929	4.75893
At1g17620	FUNCTIONS IN: molecular_function unknown; INVOLVED IN: biological_process unknown; LOCATED IN: plasma membrane; EXPRESSED IN: 23 plant structures; EXPRESSED DURING: 13 growth stages; CONTAINS InterPro DOMAIN/s: Harpin-induced 1 (InterPro:IPR010847); BEST	260686_at	-2.28996	-2.21306	6.25605e-07	0.000127411	10.8923	10.8615	10.8936	8.46977	8.71519	9.48795	8.87363	8.40668	6.38669	6.74702	6.99538
At5g63560	transferase family protein	247359_at	-2.37077	-3.65128	0.000226239	0.00524108	12.7933	12.9873	12.5082	10.4469	10.3374	11.8306	10.3515	9.47574	5.5034	7.08721	8.11347
At3g05400	sugar transporter, putative	259133_at	-2.54864	-1.07685	5.20552e-06	0.000507427	9.96814	10.4941	10.0186	7.69737	7.52595	8.73078	8.02496	7.92187	7.18917	6.73117	7.52672
At1g08990	PGSIP5 (PLANT GLYCOGENIN-LIKE STARCH INITIATION PROTEIN 5); transferase, transferring glycosyl groups	264643_at	-2.55985	-1.63875	1.93941e-05	0.00114581	8.16504	8.57388	8.24117	5.61991	5.91378	7.6891	6.63722	6.19873	5.36003	4.81114	5.43763
At2g36210	auxin-responsive family protein	263959_at	-2.58545	-1.2529	0.000192711	0.00476971	8.91951	8.92609	9.1292	6.8247	5.98759	7.48824	5.69031	6.60046	4.9254	5.74441	5.35051
At1g12400	DNA binding	259529_at	-2.68501	-2.72896	4.35048e-09	6.49389e-06	7.65096	7.39102	7.78537	5.11001	4.73821	7.83823	7.50788	7.93396	5.15156	4.73618	5.20546
At1g61800	GPT2; antiporter/ glucose-6-phosphate transmembrane transporter	264400_at	-2.69929	-1.13038	0.000957903	0.0134543	12.2637	12.4997	12.1235	9.43672	9.75594	8.8276	10.9731	9.10148	9.0892	8.57503	7.84686
At4g09600	GASA3 (GAST1 PROTEIN HOMOLOG 3)	255048_at	-2.73697	-3.13867	0.000290225	0.00614073	11.6447	10.9276	11.5414	8.76277	8.50575	9.82725	8.2124	7.84089	3.96397	6.23005	6.2705
At1g59900	AT-E1 ALPHA; oxidoreductase, acting on the aldehyde or oxo group of donors, disulfide as acceptor / pyruvate dehydrogenase (acetyl-transferring)	262908_at	-2.76862	-1.03415	5.47581e-08	2.35667e-05	9.59863	9.39352	9.52114	6.42759	7.04404	9.3165	9.51733	9.03769	8.19884	8.32461	8.24562
At3g19515	FUNCTIONS IN: molecular_function unknown; INVOLVED IN: biological_process unknown; LOCATED IN: cellular_component unknown; EXPRESSED IN: 22 plant structures; EXPRESSED DURING: 13 growth stages; CONTAINS InterPro DOMAIN/s: Apoptosis inhibitory 5 (InterPro:	258027_at	-2.91048	-1.41155	9.40856e-07	0.000168984	7.37279	7.47043	7.14615	4.60282	4.23581	7.09706	6.1171	6.00215	4.98747	4.94935	5.04485
At5g11920	AtcwINV6 (6-&1-fructan exohydrolase); hydrolase, hydrolyzing O-glycosyl compounds / inulinase/ levanase	250302_at	-2.9459	-1.46486	0.000304872	0.00633923	8.08939	8.24948	7.72586	5.2378	4.91356	7.07919	5.03973	5.07448	3.89566	4.03886	4.86431
At3g17130	invertase/pectin methylesterase inhibitor family protein	257876_at	-2.96898	-1.76254	4.48184e-05	0.00191743	10.3965	10.4529	10.4126	7.31047	7.59293	10.8853	9.99471	9.45187	9.27719	8.05408	7.713
At3g26290	CYP71B26; electron carrier/ heme binding / iron ion binding / monooxygenase/ oxygen binding	257628_at	-3.01223	-1.57638	8.872e-07	0.000160611	11.4282	11.4408	11.349	8.29684	8.49073	9.67518	9.48137	8.96917	8.44141	7.61042	7.34474
At2g46750	FAD-binding domain-containing protein	266712_at	-3.07176	-3.01106	0.000313306	0.00642671	11.4652	11.4593	11.5165	8.69514	8.12202	10.1415	7.90719	8.38097	4.26416	6.572	6.56031
At3g55920	peptidyl-prolyl cis-trans isomerase, putative / cyclophilin, putative / rotamase, putative	251772_at	-3.39414	-3.00709	7.63486e-11	6.00495e-07	7.69058	7.23733	7.47452	4.06508	4.0816	7.39047	7.39302	7.53047	4.65646	4.26014	4.3761
At4g01130	acetylesterase, putative	255607_at	-3.41367	-2.82806	9.39648e-10	2.22213e-06	7.87414	7.73689	8.04846	4.77012	4.17553	6.90047	7.16878	7.3037	4.28065	4.1377	4.47041
At2g31945	unknown protein	263475_at	-3.50609	-3.39002	1.33505e-07	4.17158e-05	9.26191	9.04097	9.44424	5.99073	5.49517	9.49261	8.81426	10.0281	5.55991	6.04075	6.56424
At3g53480	ABCG37_ATPDR9__PDR9 (PLEIOTROPIC DRUG RESISTANCE 9); ATPase, coupled to transmembrane movement of substances	251942_at	-3.63697	-1.74067	3.39832e-05	0.00162507	10.535	10.3853	10.6489	7.09842	6.67377	8.80702	6.49003	7.08132	5.54541	5.67983	5.93113
At1g55940	CYP708A1; electron carrier/ heme binding / iron ion binding / monooxygenase/ oxygen binding	260599_at	-3.9335	-3.60243	1.18378e-07	3.8031e-05	8.96637	8.2708	8.8718	5.16215	4.37684	8.26877	6.97844	7.21498	3.62212	4.18524	3.84755
At5g44380	FAD-binding domain-containing protein	249045_at	-4.18893	-3.00709	8.40707e-07	0.000153412	10.3538	10.4584	10.2466	6.17628	6.15175	9.86095	8.15442	8.2402	5.83687	5.21698	6.18046
At3g16770	ERF72_RAP2.3__ATEBP (ETHYLENE-RESPONSIVE ELEMENT BINDING PROTEIN); DNA binding / protein binding / transcription activator/ transcription factor	258434_at	-4.32852	-4.79668	1.01393e-07	3.45189e-05	13.0565	13.0948	13.1965	9.09121	8.4836	13.0906	12.9885	13.5932	7.45445	9.49963	8.32811
