# Supplementary material for: ALTERED MERISTEM PROGRAM 1 Is involved in Development of Seed Dormancy in Arabidopsis
Source: PLoS One. 2011 May 26;6(5):e20408. doi: 10.1371/journal.pone.0020408 (PMC3102729; doi:10.1371/journal.pone.0020408)
Supplement: Table S7 — Primers used in this work. (XLS) [file pone.0020408.s012.xls]

## Sheet: Sheet1
Table S7. Primers used in the QRT-PCR experiements
Gene	Forward primer (5'-3')	Reverse primer (5'-3')
ABAOH1	TTGGAAAGAGGAGACTAGAG	CACTTGGTGTTTTCTCCTTG
ABAOH2	AAATGGAGTGCACTCATGTC	CCTTCTTCATCTCCAATCAC
ABI3	CCTCGAGAACACCGGCGATT	TGTCTTACTTTAACCCCTCGTAT
ABI5	GGGAAGGAAAAGAGTAGTGGAT	CCACTGTATATGCTTGTTTTCTT
AMP1	GCCTTACCACGCTTATTCTCC	TTCCTCGCTAAAACCACACAC
CYC	TGGACCAGGTGTACTTTCAATGG	CCACTGTCTGCAATTACGACTTTG
FUS3	TCTGTGCCTCTTCTTGGTGTT	ATTTTACGTGCGGGGAGAG
LEC1	ACCGTCGTTGAGACAAACCT	TACCGACCACCTCCCATAAC
NCED6	GTTTACATAGCAATAGCCGATCCTT	TTCAACTGATTCTCGCTCAC
NCED9	TAATGGTGTTCGTTCACGAC	CTAACACAAAGCTTGCTTCG
